# Supplementary material for: Multiple uprising invasions of Pelophylax water frogs, potentially inducing a new hybridogenetic complex
Source: PubMed Central journal article supplement (PMC5529583; doi:10.1038/s41598-017-06655-5), 2017-07-26

# **Multiple uprising invasions of *Pelophylax* water frogs, potentially inducing a new hybridogenetic complex**

**Christophe Dufresnes, Mathieu Denoël, Lionel di Santo and Sylvain Dubey**

## **Supplementary Information**

**Supplementary Table 1:** Locality information

**Supplementary Table 2:** Diversity of each taxon

**Supplementary Table 3:** Pairwise genetic distances

**Supplementary Figure 1:** Phylogenetic analyses of a portion of *cyt-b* (514bp aligned)

**Supplementary Figure 2:** STRUCTURE statistics

**Supplementary Figure 3:** Morphometric analyses

**Supplementary Table 1A:** Locality information. n indicates samples sizes used in morphometric (morpho), mitochondrial (mtDNA) and nuclear ( $\mu$ sat) analyses. Lat.: latitude; Long.: longitude.  $H_o$ : observed heterozygosity for populations with sufficient sample sizes ( $n \geq 6$ ), some of which has been pooled (4-5, 8-9, 17-18). Null: detection of null alleles (genotypes were subsequently corrected).

| ID | Locality                      | Lat.     | Long.   | $N_{\text{morpho}}$ | $N_{\text{mtDNA}}$ | $N_{\mu\text{sat}}$ | $H_o$ | Null                           |
|----|-------------------------------|----------|---------|---------------------|--------------------|---------------------|-------|--------------------------------|
| 1  | Ville Vieille                 | 43.89888 | 3.40549 | 6                   | 7                  | 10                  | 0.58  | <i>Rica1b5, Rica5</i>          |
| 2  | Four Banal                    | 43.89393 | 3.40214 | 7                   | 6                  | 10                  | 0.55  | <i>Rica5</i>                   |
| 3  | Château de Sorbs SW           | 43.89109 | 3.40428 | 0                   | 1                  | 1                   | -     | -                              |
| 4  | Baume Vieille W               | 43.88821 | 3.39876 | 4                   | 5                  | 5                   | 0.57  | <i>Rica1b6</i>                 |
| 5  | Moulin W                      | 43.88874 | 3.39742 | 2                   | 3                  | 5                   | -     | <i>Res16</i>                   |
| 6  | Sotch de Caylus               | 43.88920 | 3.38701 | 4                   | 4                  | 4                   | -     | -                              |
| 7  | Corombelle                    | 43.89413 | 3.38113 | 0                   | 1                  | 1                   | -     | -                              |
| 8  | Cros Farm                     | 43.86995 | 3.36963 | 3                   | 2                  | 6                   | 0.56  | -                              |
| 9  | Cros réservoir                | 43.86604 | 3.36769 | 0                   | 0                  | 3                   | -     | -                              |
| 10 | Bergerie de l'Hôpital         | 43.86057 | 3.37910 | 8                   | 7                  | 10                  | 0.48  | <i>Res16, ReGa1a23</i>         |
| 11 | Bagnolades                    | 43.85557 | 3.36178 | 5                   | 5                  | 7                   | 0.49  | -                              |
| 12 | St-Michel Le Laquet           | 43.84344 | 3.38469 | 0                   | 4                  | 6                   | 0.58  | -                              |
| 13 | Besses                        | 43.84160 | 3.47962 | 0                   | 1                  | 4                   | -     | -                              |
| 14 | Source du Goutal (Trop plein) | 43.77180 | 3.46051 | 0                   | 1                  | 1                   | -     | -                              |
| 15 | Devois la Trivalle            | 43.75166 | 3.48255 | 0                   | 1                  | 2                   | -     | -                              |
| 16 | Ferrussac                     | 43.79902 | 3.49786 | 0                   | 0                  | 4                   | -     | -                              |
| 17 | Coulet Tournant               | 43.82167 | 3.52965 | 0                   | 2                  | 4                   | 0.59  | -                              |
| 18 | Coulet NE                     | 43.82089 | 3.53980 | 2                   | 0                  | 2                   | -     | -                              |
| 19 | Mare du Goutal                | 43.81801 | 3.56600 | 0                   | 2                  | 2                   | -     | -                              |
| 20 | Natges                        | 43.83119 | 3.56029 | 0                   | 2                  | 2                   | -     | -                              |
| 21 | Rancas N                      | 43.84761 | 3.55923 | 0                   | 0                  | 1                   | -     | -                              |
| 22 | Bairades                      | 43.89098 | 3.66388 | 0                   | 1                  | 1                   | -     | -                              |
| 23 | Lac de Condamine              | 43.86694 | 3.68313 | 5                   | 6                  | 6                   | 0.57  | <i>Res16</i>                   |
| 24 | Clapas de Lamathe             | 43.86312 | 3.68620 | 8                   | 7                  | 8                   | 0.68  | <i>Rica5, Res16</i>            |
| 25 | Source de la Pradasse         | 43.85593 | 3.66607 | 1                   | 2                  | 2                   | -     | -                              |
| 26 | Source de la Buèges           | 43.81332 | 3.59095 | 2                   | 3                  | 9                   | 0.58  | <i>Rica5, Res16, ReGa1a23</i>  |
| 27 | Penchant du Salagou           | 43.65746 | 3.40653 | 7                   | 9                  | 11                  | 0.25  | <i>Rica5</i>                   |
| 28 | Octon (Plage - Salagou)       | 43.65320 | 3.32799 | 10                  | 8                  | 12                  | 0.25  | <i>Rica1b5, Rica1b6, Rica5</i> |

**Supplementary Table S1B:** Samples used as references in phylogenetic analyses of *cyt-b* (975bp aligned).

| <b>GenBank</b> | <b>Species</b>         | <b>Origin</b>              | <b>Reference</b>                                         |
|----------------|------------------------|----------------------------|----------------------------------------------------------|
| KP260932       | <i>P. bedriagae</i>    | Jordan                     | -                                                        |
| -              | <i>P. bedriagae</i>    | Switzerland, Luzern        | Dufresnes et al. 2017, Invasion Biol..                   |
| -              | <i>P. bergeri</i>      | Italy, Switzerland, France | Dufresnes et al. 2017, Invasion Biol..                   |
| KM677928       | <i>P. cretensis</i>    | Greece, Crete              | Hofman et al. 2016, Mitochondrial DNA 27: 1995-1996      |
| KP814009       | <i>P. cypriensis</i>   | Greece, Cyprus             | Hofman et al. 2016, Mitochondrial DNA 27: 3434-3437      |
| KP814010       | <i>P. epeiroticus</i>  | Greece                     | Hofman et al. 2016, Mitochondrial DNA 27: 3434-3437      |
| KP814011       | <i>P. kurtmuelleri</i> | Greece                     | Hofman et al. 2016, Mitochondrial DNA 27: 3434-3437      |
| -              | <i>P. kurtmuelleri</i> | Albania, Petrele           | this study                                               |
| -              | <i>P. lessonae</i>     | Europe                     | Dufresnes et al. 2017, Invasion Biol..                   |
| DQ902145       | <i>P. perezi</i>       | Spain                      | Busack and Lawson 2008, Biol J Linn Soc Lond 94: 445-461 |
| -              | <i>P. perezi</i>       | Spain, Ronda               | this study                                               |
| -              | <i>P. perezi</i>       | Spain, Gran Canaria        | this study                                               |
| -              | <i>P. perezi</i>       | Spain, Trujilo             | this study                                               |
| -              | <i>P. perezi</i>       | Spain                      | this study                                               |
| JN627421       | <i>P. ridibundus</i>   | Poland, Popowo             | Hofman et al. 2012, Gene 491: 71-80                      |
| JN627423       | <i>P. ridibundus</i>   | Poland, Rafa               | Hofman et al. 2012, Gene 491: 71-80                      |
| -              | <i>P. ridibundus</i>   | Switzerland, Graubünden    | Dufresnes et al. 2017, Invasion Biol..                   |
| KP814012       | <i>P. shqipericus</i>  | Montenegro                 | Hofman et al. 2016, Mitochondrial DNA 27: 3434-3437      |

**Supplementary Table 2: Mitochondrial (*cyt-b*) and nuclear (microsatellites) diversity for each taxon identified in the study area.** n: sample sizes; H<sub>d</sub>: haplotype diversity; π: nucleotide diversity; N<sub>a</sub>: number of alleles; H<sub>o</sub>: observed heterozygosity.

|                        | <b>MtDNA</b> |                |         | <b>Nuclear</b> |                |                |
|------------------------|--------------|----------------|---------|----------------|----------------|----------------|
|                        | n            | H <sub>d</sub> | π       | n              | N <sub>a</sub> | H <sub>o</sub> |
| <i>P. perezi</i>       | 27           | 0.721          | 0.00164 | 24             | 1.9            | 0.24           |
| <i>P. ridibundus</i>   | 42           | 0.465          | 0.00053 | 58             | 5.4            | 0.54           |
| <i>P. kurtmuelleri</i> | 19           | 0.515          | 0.00106 | 36             | 7.5            | 0.65           |

**Supplementary Table 3:** Genetic distance (pairwise  $F_{st}$ ) between populations with enough sample size ( $n \geq 6$ ). Colors indicate the dominant species in each locality (green: *P. ridinbundus*; yellow: *P. kurtmuelleri*; red: *P. perezii*).

|       | 1     | 2     | 4-5   | 8-9   | 10    | 11    | 12    | 17-18 | 23    | 24    | 26    | 27    | 28 |
|-------|-------|-------|-------|-------|-------|-------|-------|-------|-------|-------|-------|-------|----|
| 1     | -     |       |       |       |       |       |       |       |       |       |       |       |    |
| 2     | 0.016 | -     |       |       |       |       |       |       |       |       |       |       |    |
| 4-5   | 0.000 | 0.024 | -     |       |       |       |       |       |       |       |       |       |    |
| 8-9   | 0.031 | 0.086 | 0.038 | -     |       |       |       |       |       |       |       |       |    |
| 10    | 0.166 | 0.216 | 0.158 | 0.050 | -     |       |       |       |       |       |       |       |    |
| 11    | 0.040 | 0.107 | 0.076 | 0.000 | 0.059 | -     |       |       |       |       |       |       |    |
| 12    | 0.000 | 0.010 | 0.012 | 0.023 | 0.028 | 0.000 | -     |       |       |       |       |       |    |
| 17-18 | 0.182 | 0.256 | 0.231 | 0.201 | 0.220 | 0.172 | 0.184 | -     |       |       |       |       |    |
| 23    | 0.306 | 0.372 | 0.351 | 0.331 | 0.338 | 0.334 | 0.317 | 0.021 | -     |       |       |       |    |
| 24    | 0.188 | 0.256 | 0.247 | 0.251 | 0.270 | 0.267 | 0.227 | 0.110 | 0.216 | -     |       |       |    |
| 26    | 0.198 | 0.287 | 0.258 | 0.241 | 0.284 | 0.261 | 0.274 | 0.004 | 0.121 | 0.178 | -     |       |    |
| 27    | 0.419 | 0.496 | 0.475 | 0.534 | 0.614 | 0.610 | 0.493 | 0.520 | 0.496 | 0.334 | 0.453 | -     |    |
| 28    | 0.417 | 0.492 | 0.472 | 0.520 | 0.613 | 0.591 | 0.476 | 0.485 | 0.424 | 0.269 | 0.403 | 0.110 | -  |

**Supplementary Figure 1: Phylogenetic analyses of a portion of *cyt-b* (514bp aligned), enabling comparisons with sequences covering the ranges and diversity of Eastern-Mediterranean marsh frogs (available on Genbank). Genbank accessions and origin of individuals are indicated. Haplotypes identified in this study (based on 975bp, see Figure 1 in the main text) are shown in color (bold: study area). Numbers show branch support (based on 1 000 bootstrap replicates) for major nodes.**

0.1

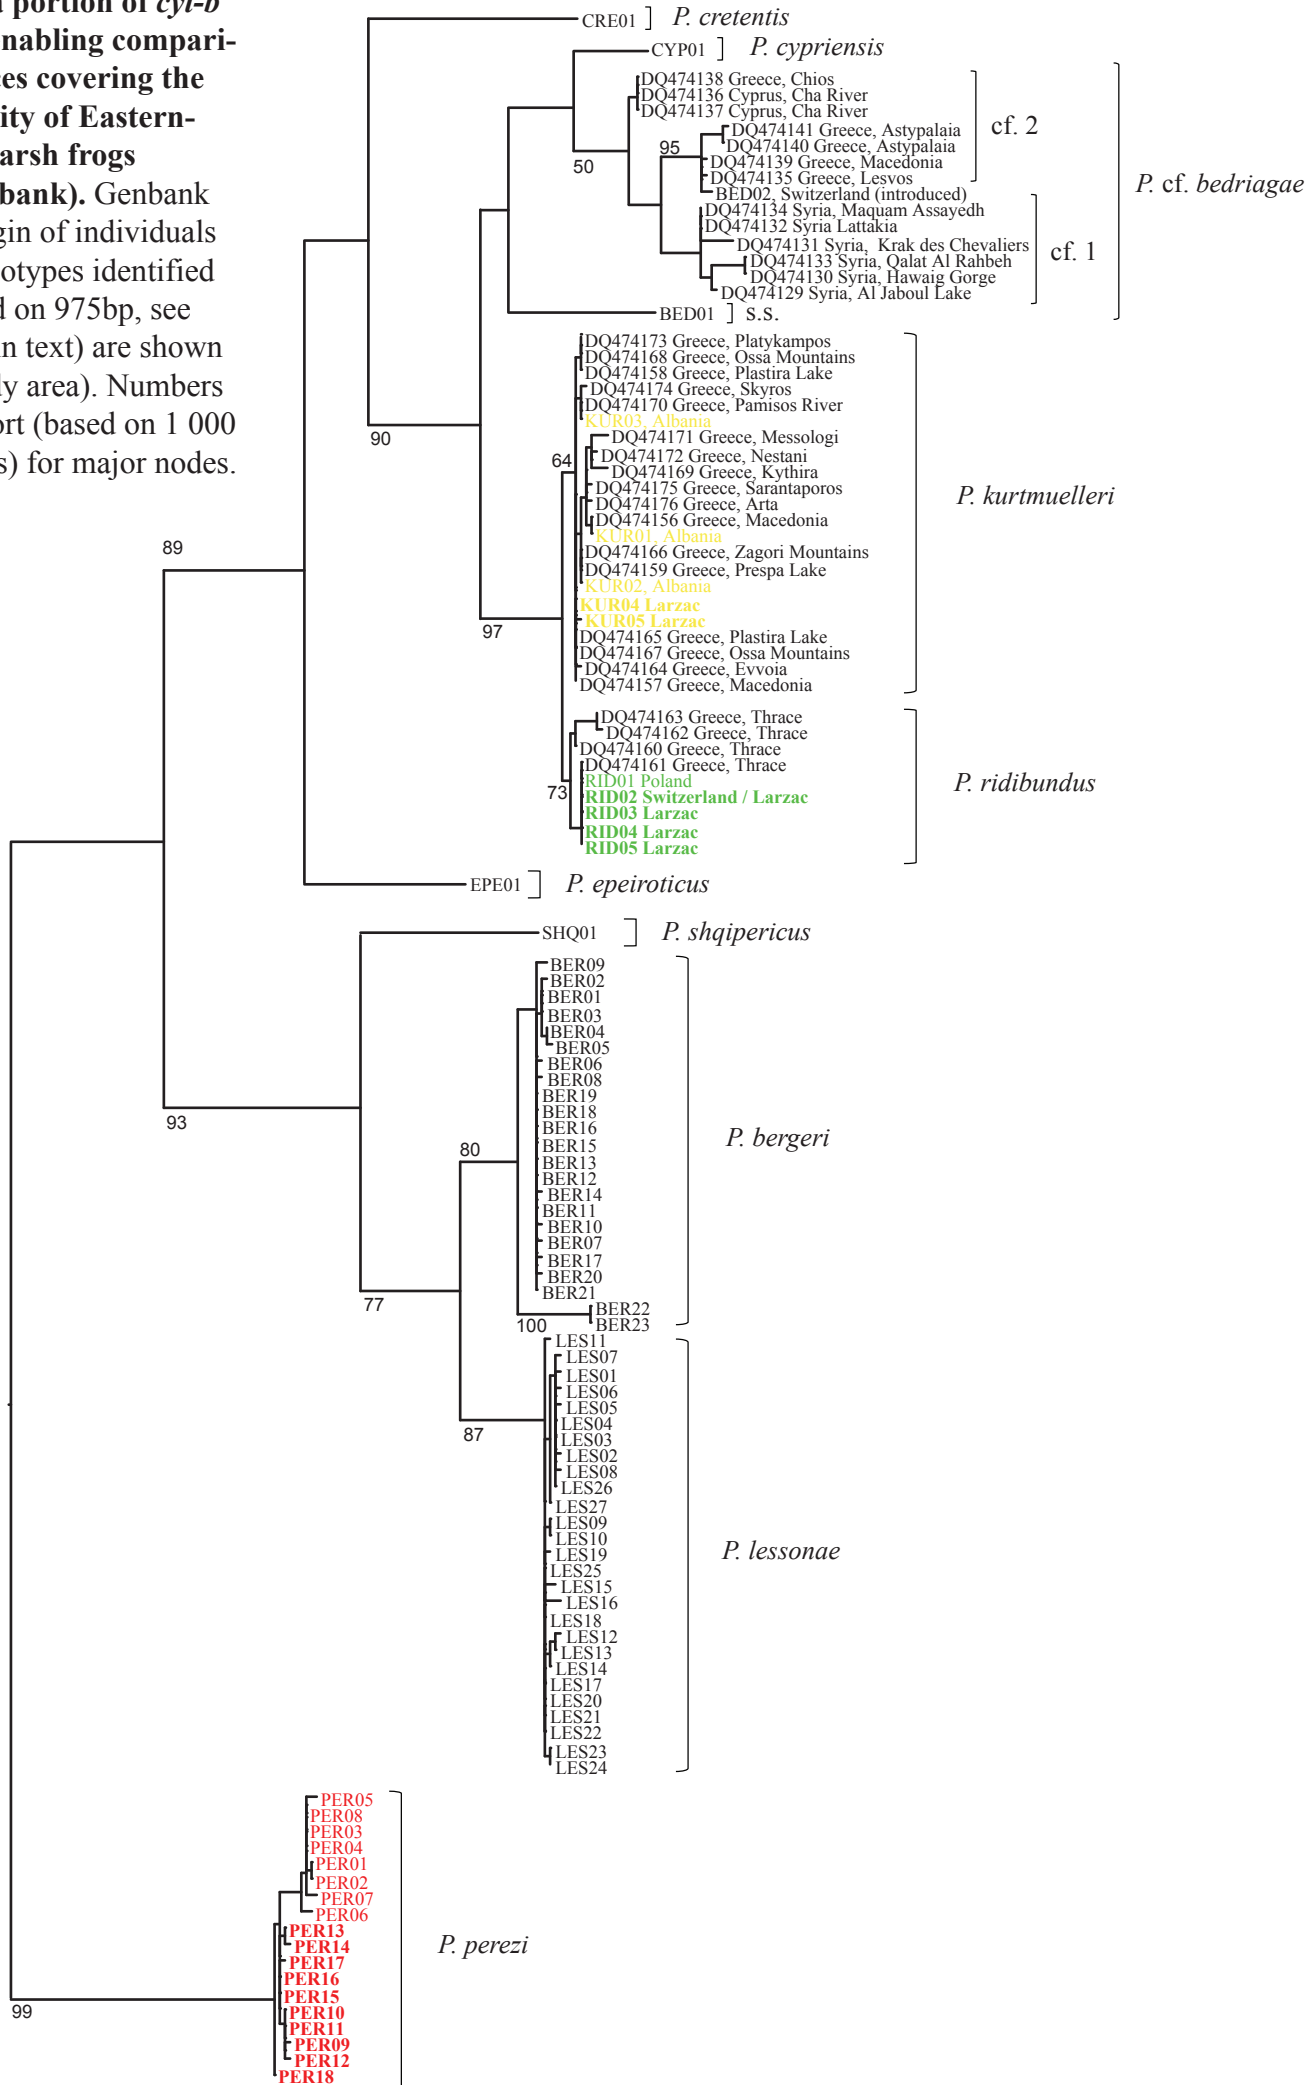

**Supplementary Figure 2:** Average log-likelihood  $\Pr(X | K)$  and  $\Delta K$  statistics of the STRUCTURE analyses. Barplots provide individuals assignments for the recommended  $K$ s.

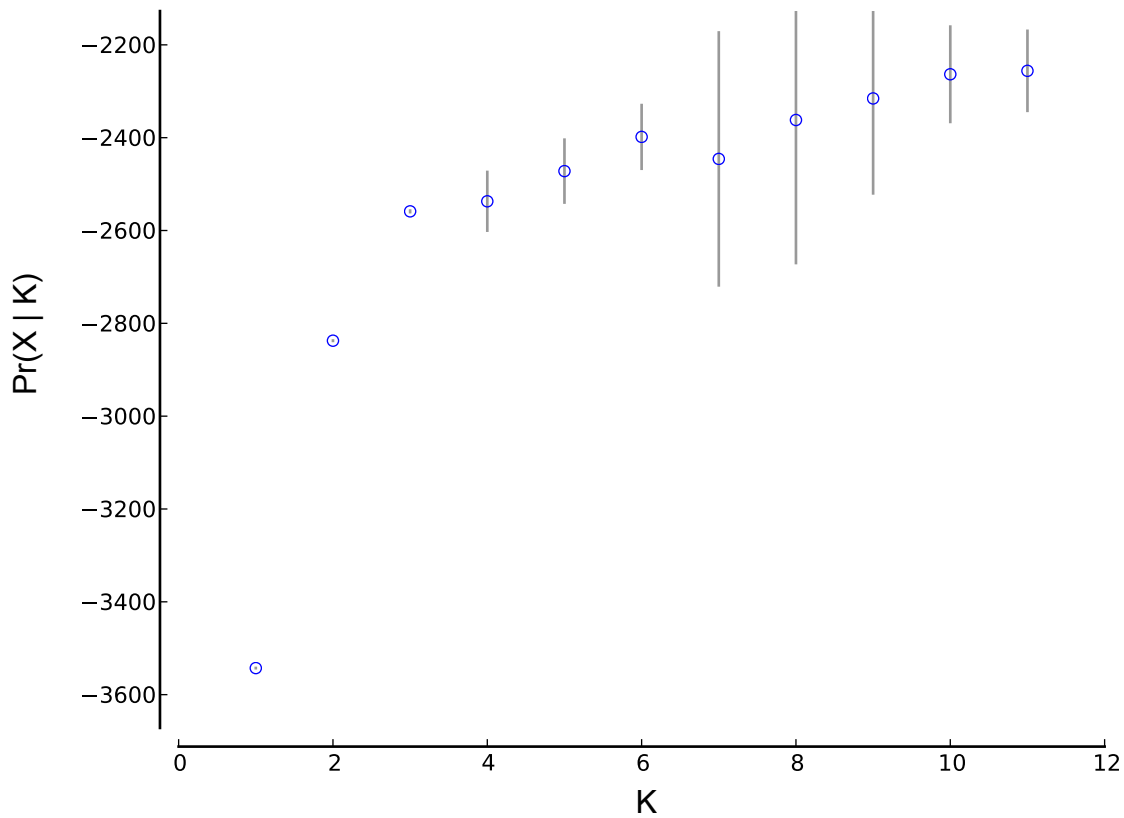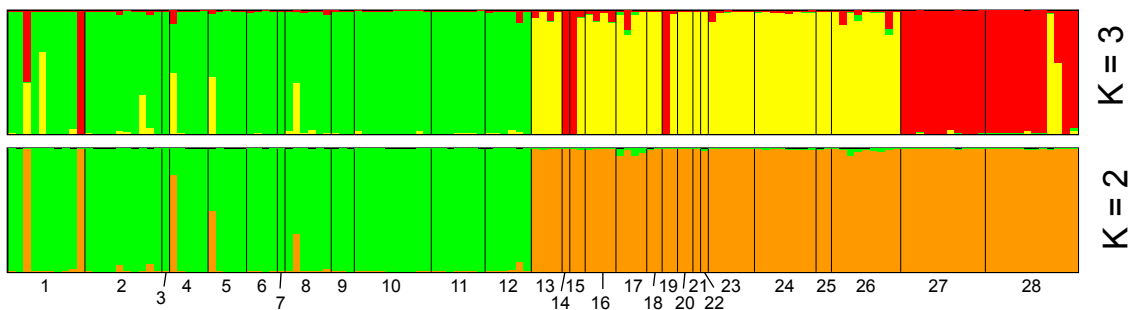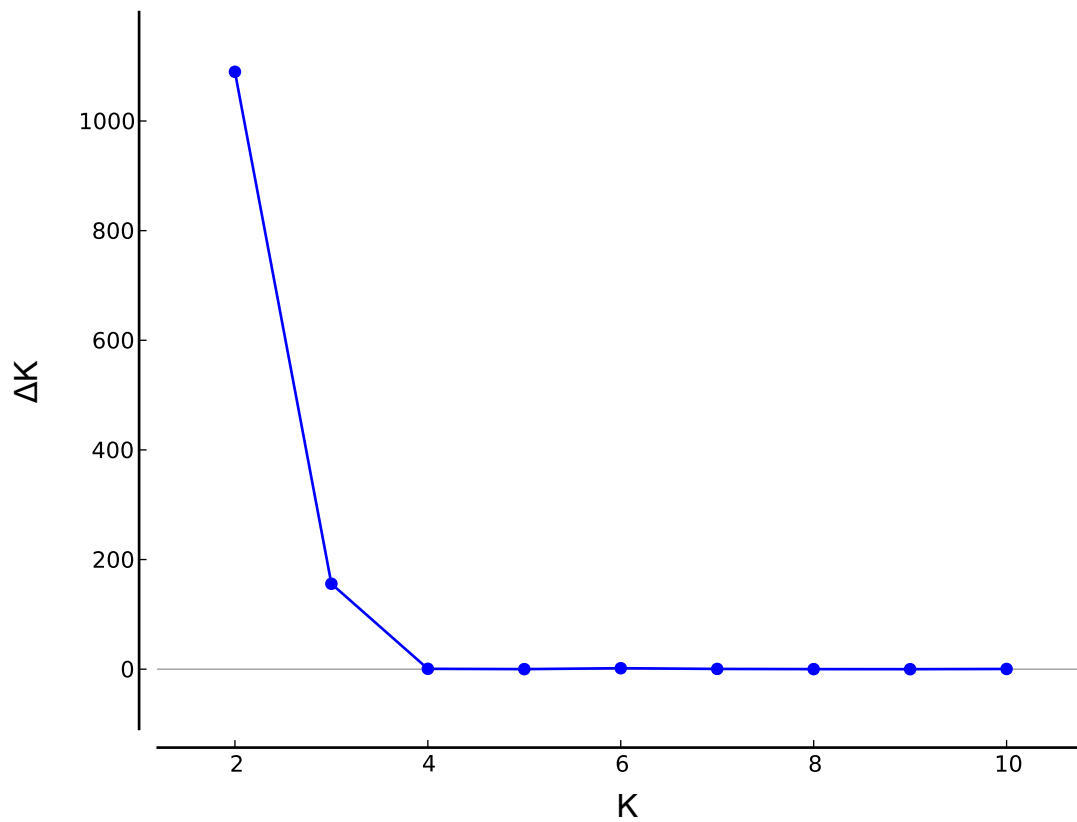

**Supplementary Figure 3: Morphometric analyses.** (A) PCA on morphometrics and (B) species comparisons. Significance of Tuckey's HSD tests are given: NS: non-significant, \* p-value < 0.05. Crosses show the two *P. kurtmuelleri* × *P. perezi* hybrids, that may represent a new klepton.

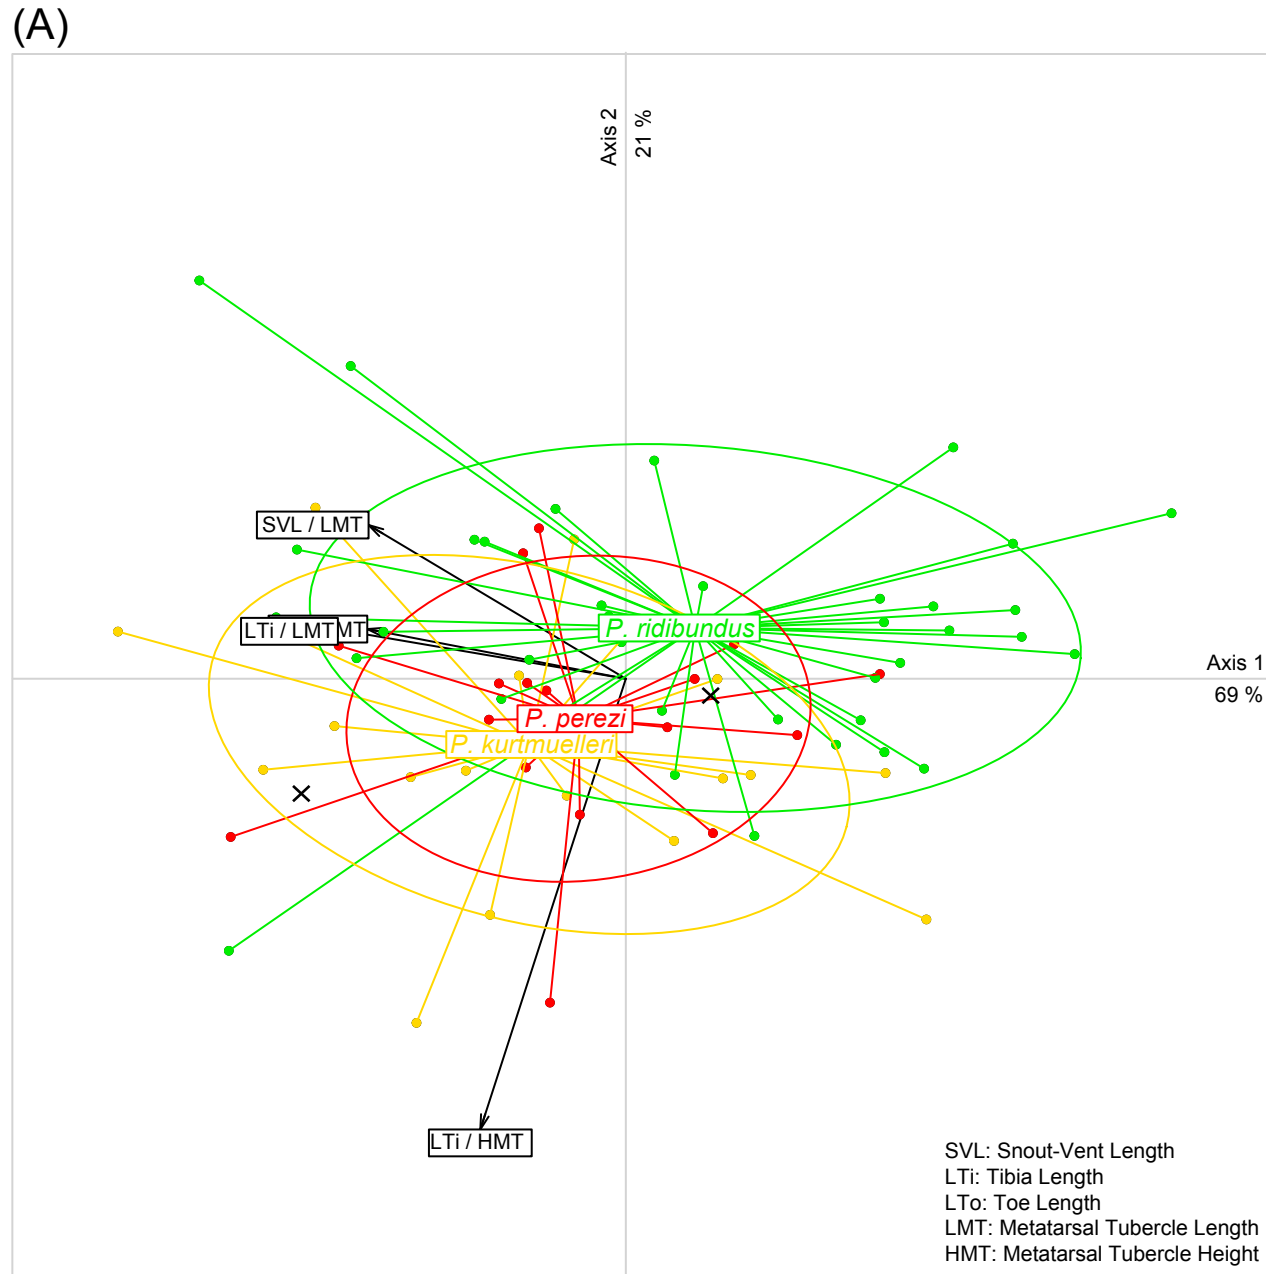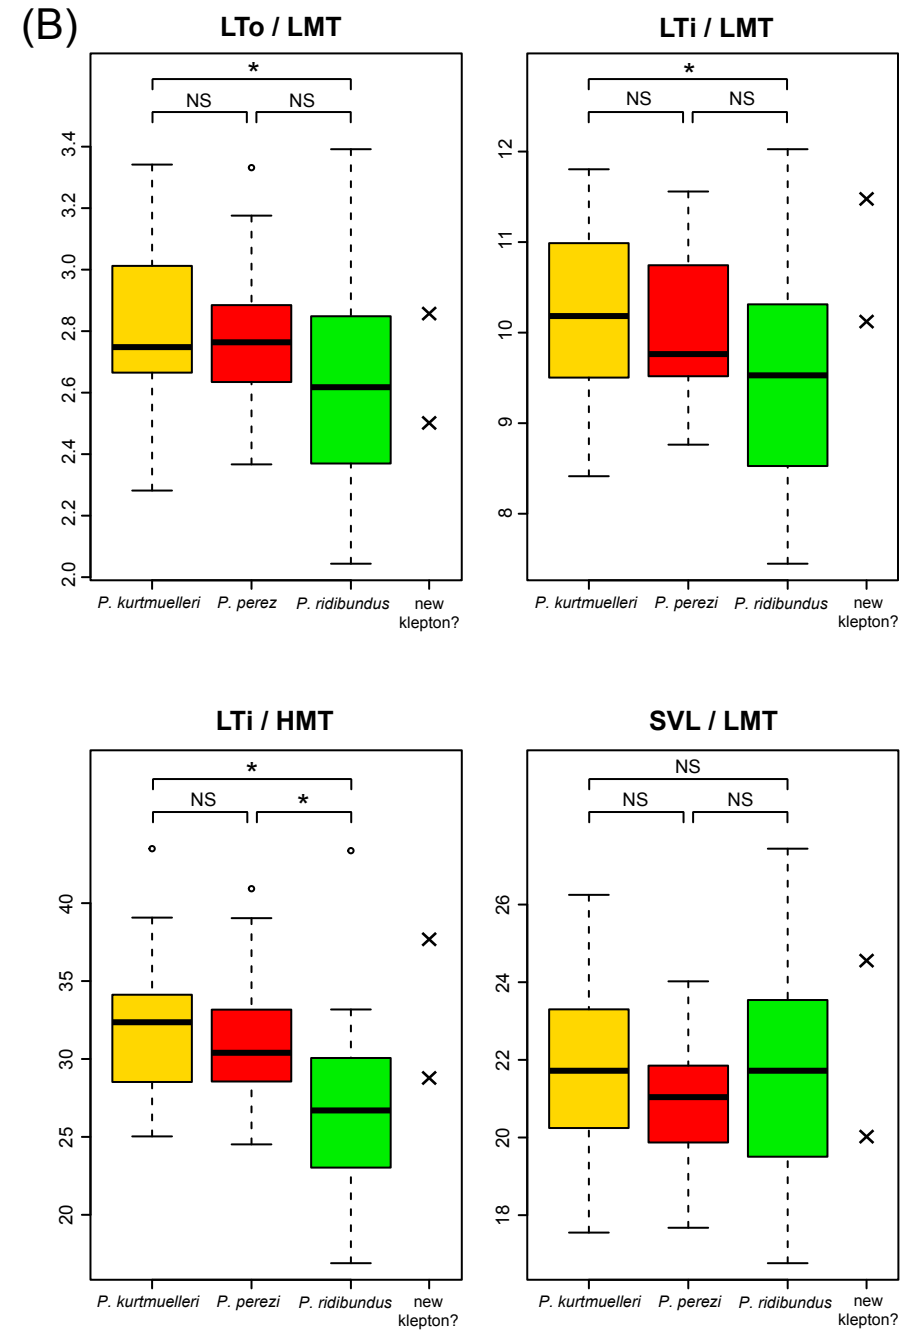

Supplement: 41598_2017_6655_MOESM1_ESM.pdf [file 41598_2017_6655_MOESM1_ESM.pdf]
